# Supplementary material
Source: publisher figshare collection journal article supplement (https://acs.figshare.com/ndownloader/files/4458469)
Supplement: Supplementary file 1 [file 4458469]

## Supplementary Figures (1-6)

Figure 1

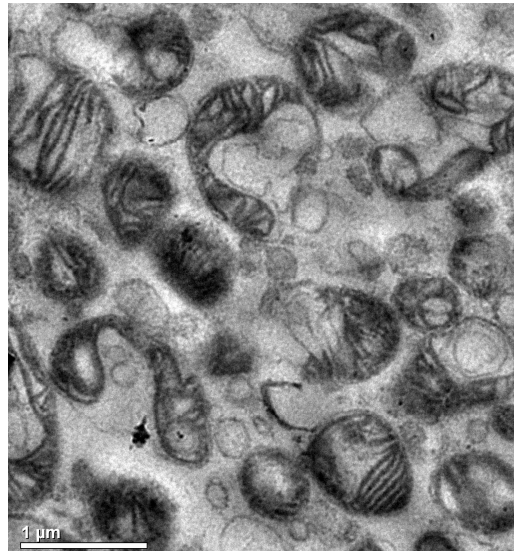

Figure 1. Picture of isolated mitochondria by TEM.

Figure 2

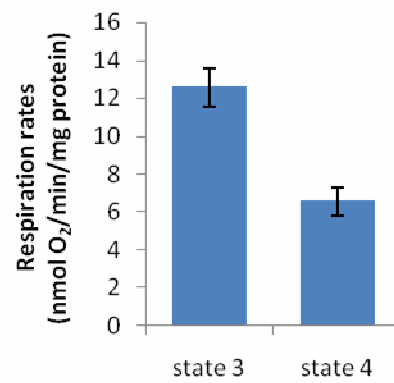

Figure 2. The respiration rates of isolated mitochondria. The “state 4” respiration indicates the mitochondria suspension with addition of disodium succinate and the “state 3” respiration indicates that ADP was consumed by mitochondria.

Figure 3

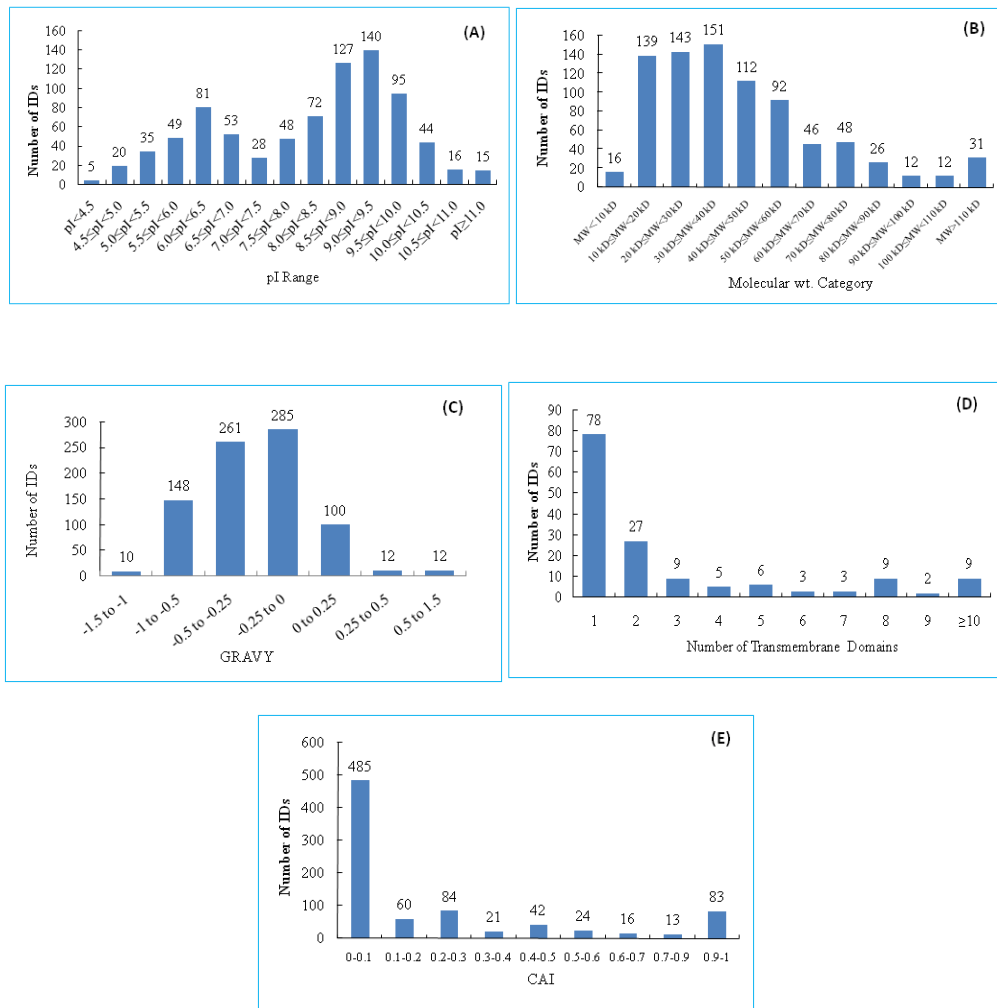

Figure 3. Physiochemical characteristics of mitochondrial proteins from rat pancreatic INS-1  $\beta$  cell line. Distribution of the identified mitochondrial proteins from rat pancreatic INS-1  $\beta$  cell line in relation to their pI (A), molecular mass (B), GRAVY (C), trans membrane Domain (D) and CAI (E) are shown.

Figure 4

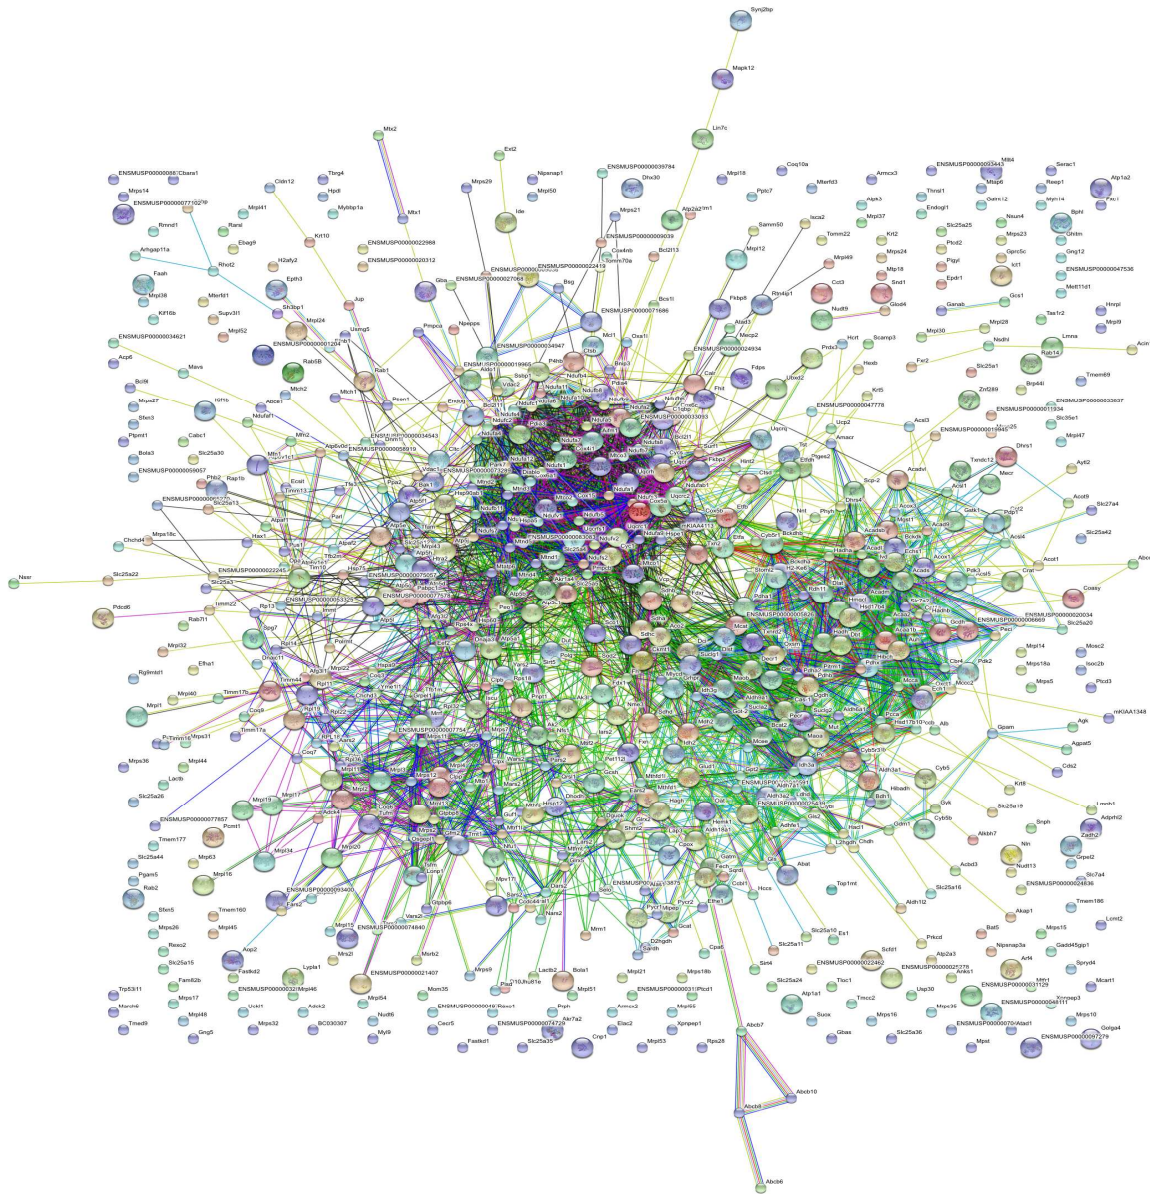

Figure 4. Interactions of mitochondrial proteins identified here as predicted by on-line STRING software against rat database. Network edges represent predicted functional associations. Red lines: fusion evidence; green lines: neighbourhood evidence; blue lines: co-occurrence evidence; purple lines: experimental evidence; yellow lines: text-mining evidence; light blue lines: database evidence; black lines: coexpression evidence.

Figure 5

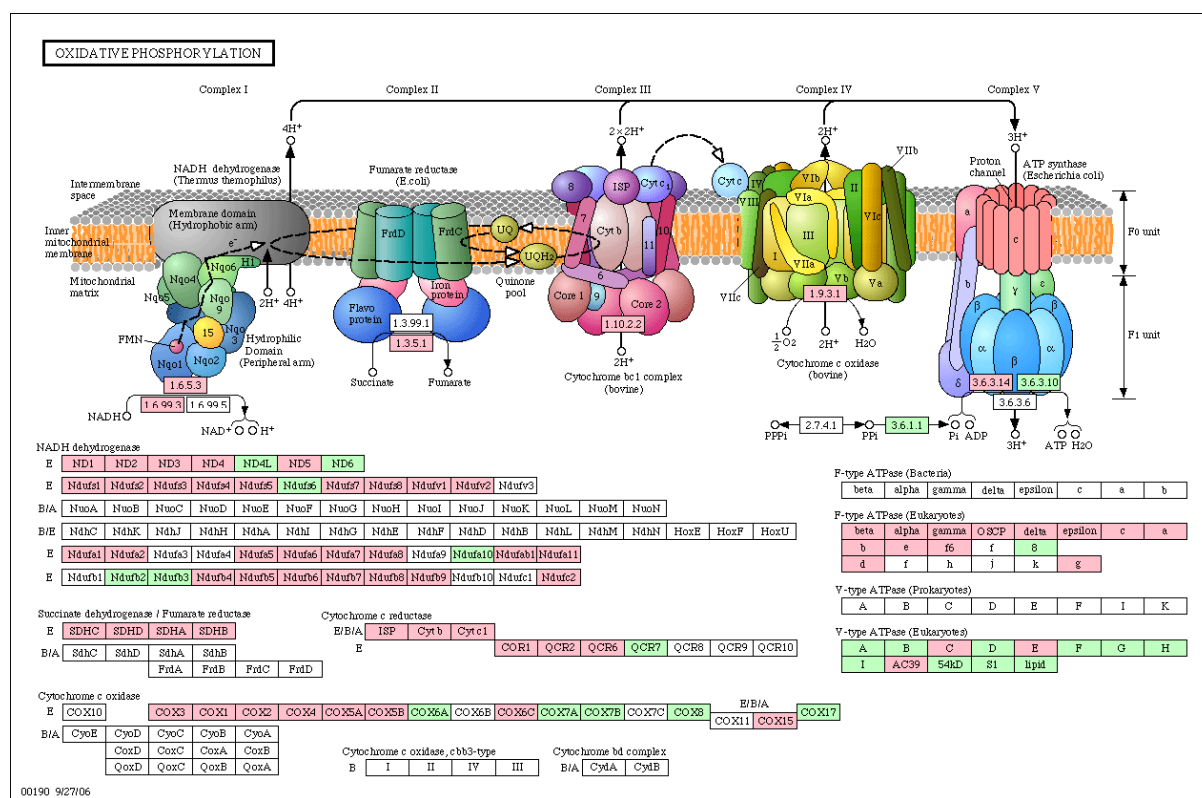

Figure 5. The identified components of TCA cycle presented in KEGG pathway. The protein names highlighted by red color are identified proteins in this study.

Figure 6

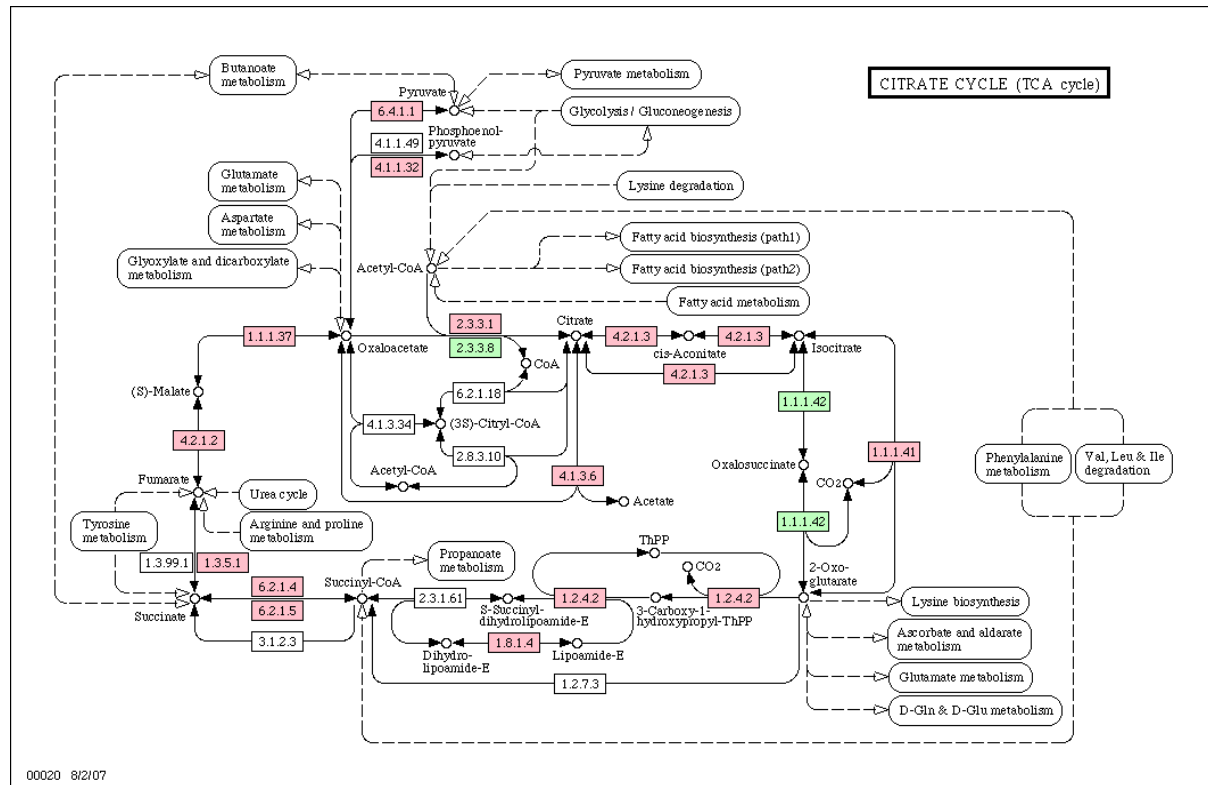

Figure 6. The identified components of oxidative phosphorylation presented in KEGG pathway. The protein names highlighted by red color are identified proteins in this study.
